# Supplementary material
Source: Springer Nature journal article supplement (https://www.springermedizin.de/resource/supplementary/12884_2011_415_MOESM3_ESM.pdf/9457660)

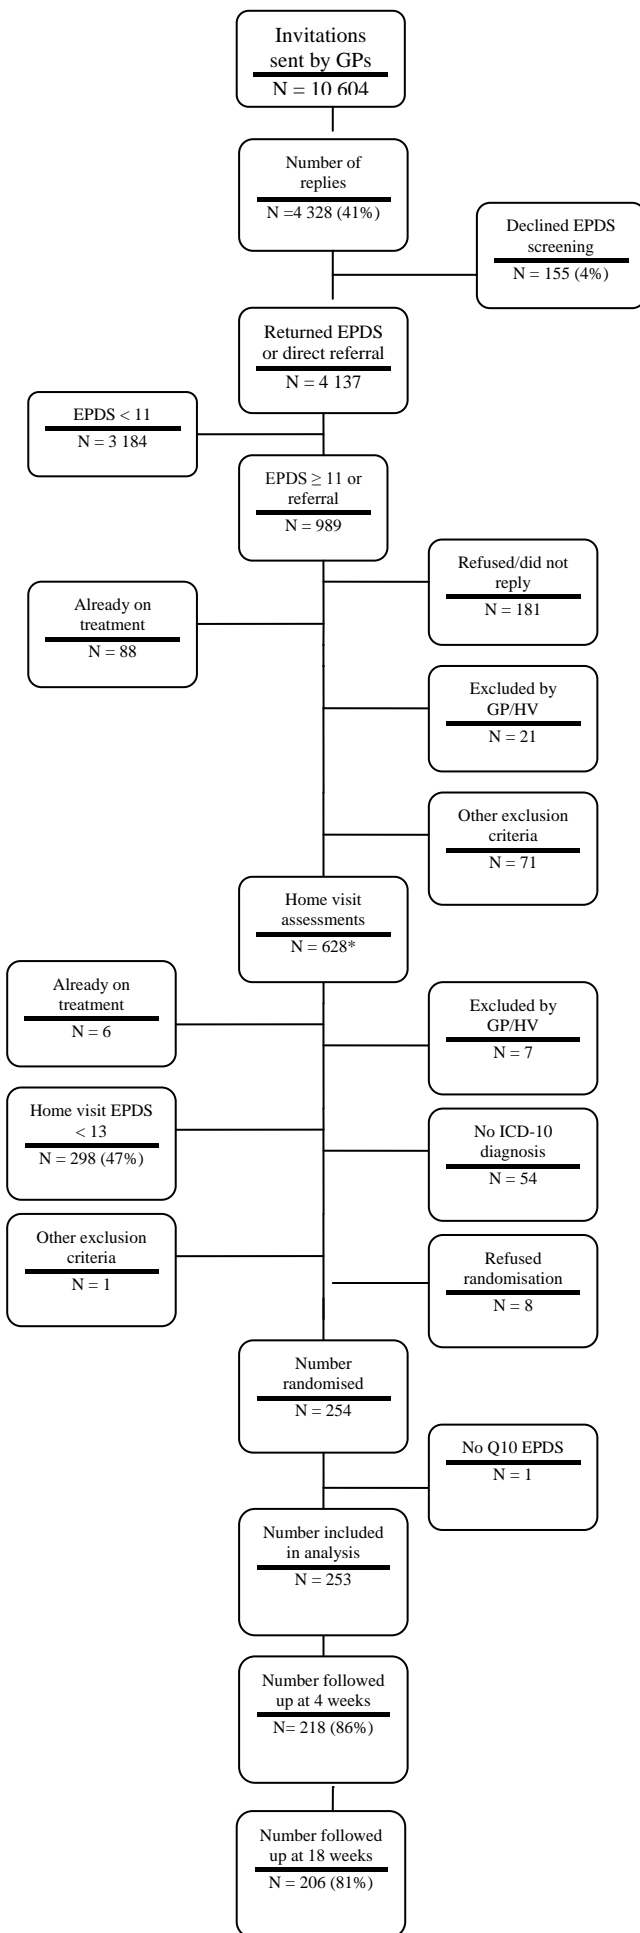

T  
R  
E  
A  
T  
M  
E  
N  
T

Supplement: MOESM3 [file 9457660]
